# Supplementary material
Source: Springer Nature journal article supplement (https://www.springermedizin.de/resource/supplementary/13054_2009_8309_MOESM3_ESM.pdf/9731674)

Cytokine mRNA Expression  
(x-fold over Sham control)

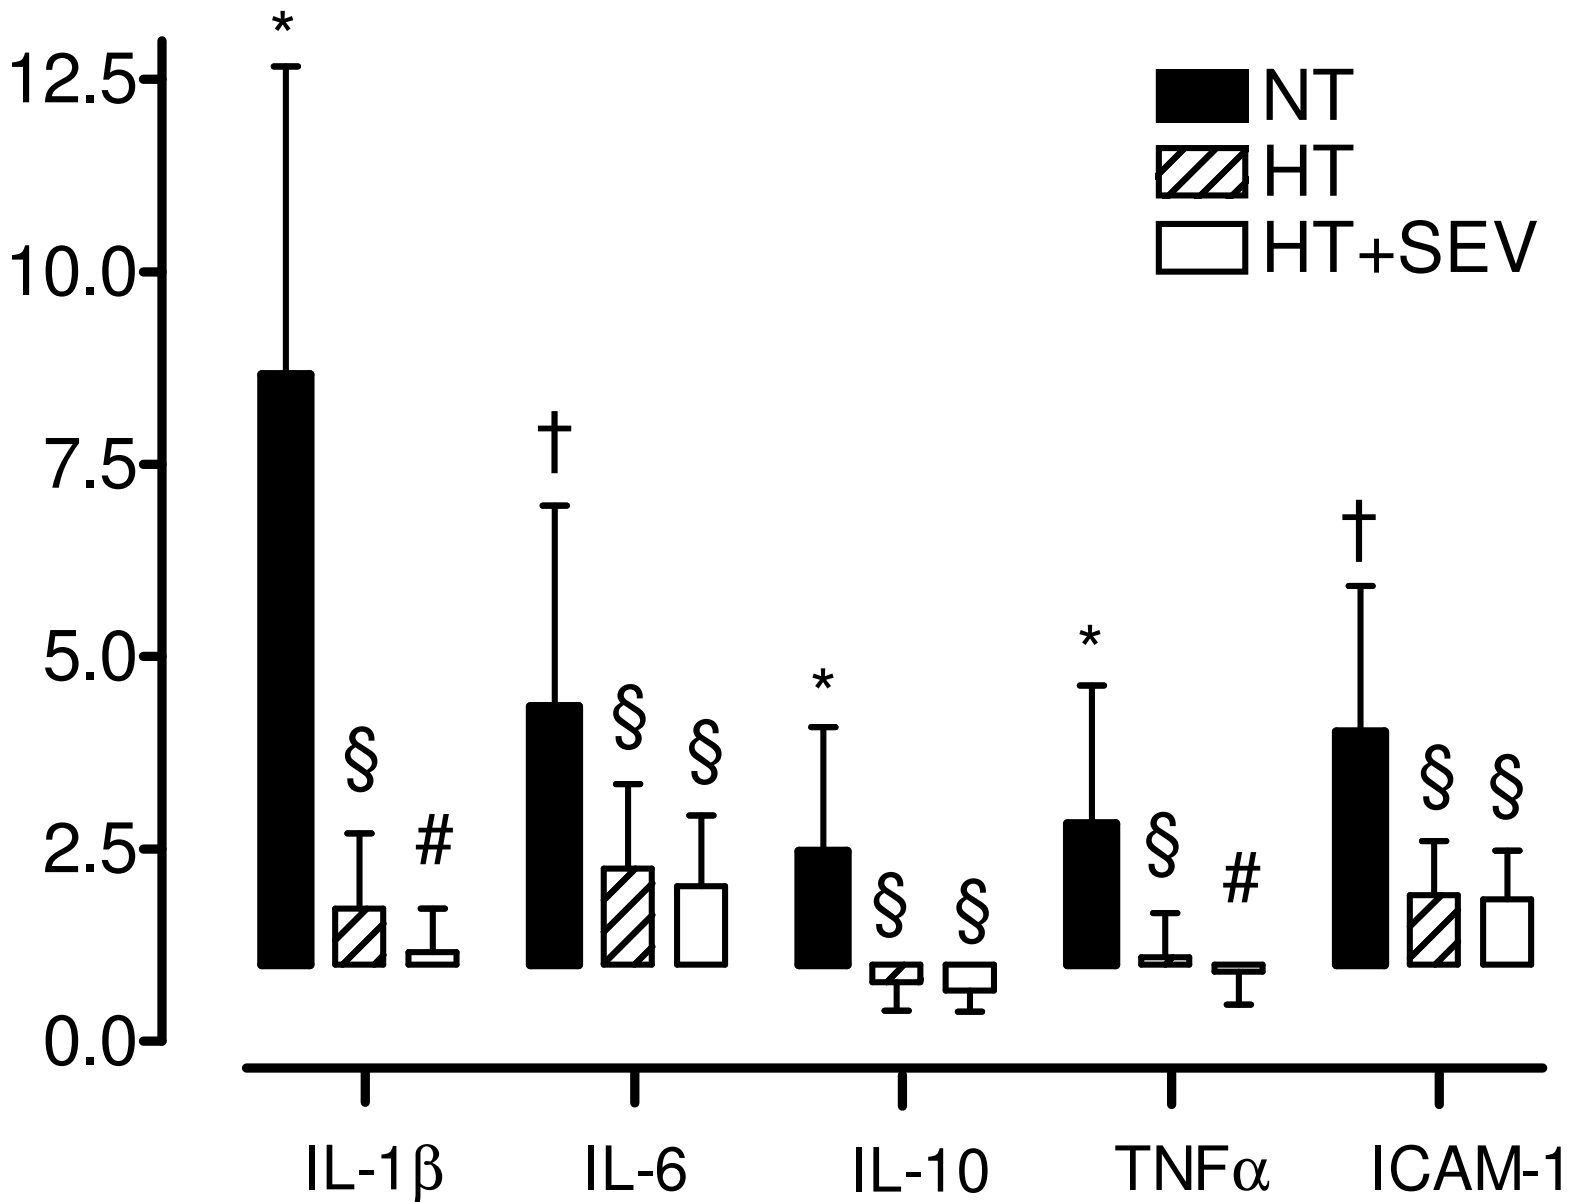

Supplement: MOESM3 [file 9731674]
